# Supplementary figures and images for: Diversity in Cell Morphology, Composition, and Function among Adipose Depots in River Buffaloes
Source: MDPI journal article supplement (doi:10.3390/ijms24098410), 2023-05-07

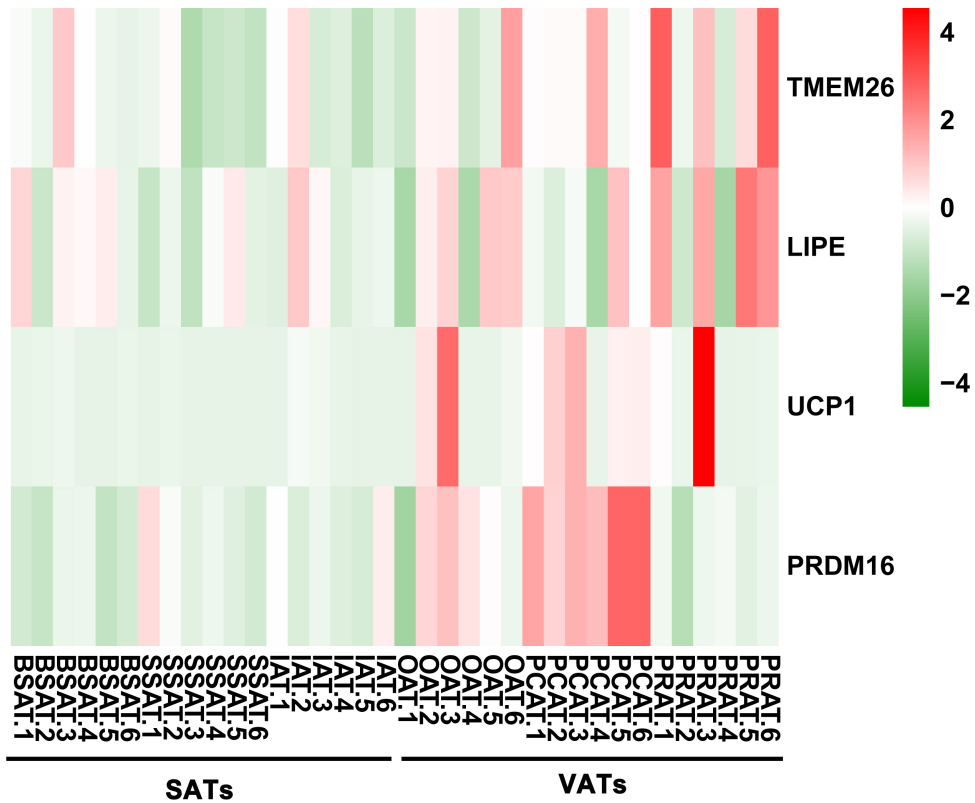

Supplement: s1 [file s1]
